# Supplementary material for: Whole Yeast Vaccine Displaying ZIKV B and T Cell Epitopes Induces Cellular Immune Responses in the Murine Model
Source: MDPI journal article supplement (doi:10.3390/pharmaceutics15071898), 2023-07-06
Supplement: s1 [file s1]

### Supplementary Material

**Table S1:** Secretion of splenic cytokines after *in vitro* re-stimulus. There was no significant stimulus for the production of cytokines IL-2, IL-4, IL-10, IL-17A. Levels measured in pg.mL<sup>-1</sup>. Values express mean  $\pm$  standard deviation.

| Cytokine      | 24h                   |                      |                       | 48h                  |                      |                       | 72h                   |                       |                       |
|---------------|-----------------------|----------------------|-----------------------|----------------------|----------------------|-----------------------|-----------------------|-----------------------|-----------------------|
|               | nr                    | ENV                  | ENVNS1                | nr                   | ENV                  | ENVNS1                | nr                    | ENV                   | ENVNS1                |
| <b>IL-2</b>   | 440.89<br>$\pm$ 13.51 | 447.33<br>$\pm$ 5.79 | 432.00<br>$\pm$ 13.69 | 421.77<br>$\pm$ 7.05 | 432.72<br>$\pm$ 8.21 | 419.19<br>$\pm$ 4.04  | 410.6<br>$\pm$ 10.02  | 412.80<br>$\pm$ 2.55  | 417.42<br>$\pm$ 13.12 |
| <b>IL-4</b>   | 907.44<br>$\pm$ 0.90  | 905.87<br>$\pm$ 0.09 | 906.68<br>$\pm$ 0.88  | 905.67<br>$\pm$ 0.58 | 905.66<br>$\pm$ 0.70 | 905.60<br>$\pm$ 0.58  | 904.47<br>$\pm$ 0.55  | 904.78<br>$\pm$ 0.51  | 905.54<br>$\pm$ 0.77  |
| <b>IL-10</b>  | 132.75<br>$\pm$ 8.02  | 117.48<br>$\pm$ 5.30 | 130.56<br>$\pm$ 4.11  | 117.31<br>$\pm$ 6.51 | 123.21<br>$\pm$ 7.85 | 121.41<br>$\pm$ 13.85 | 119.53<br>$\pm$ 12.85 | 124.0<br>1 $\pm$ 7.67 | 124.48<br>$\pm$ 8.65  |
| <b>IL-17A</b> | 153.59<br>$\pm$ 1.21  | 150.09<br>$\pm$ 0.96 | 152.55<br>$\pm$ 3.61  | 151.35<br>$\pm$ 1.55 | 156.86<br>$\pm$ 4.12 | 151.28<br>$\pm$ 7.68  | 145.75<br>$\pm$ 2.85  | 146.89<br>$\pm$ 1.91  | 149.45<br>$\pm$ 5.14  |

**Table S2:** Average weight of the mice groups throughout the immunization experiment. Values correspond to mean  $\pm$  standard deviation.

| GROUPS                    | Weight (g)       |                  |                  |
|---------------------------|------------------|------------------|------------------|
|                           | Day 1            | Day 7            | Day 21           |
| <i>P. pastoris</i> :nr    | 21.66 $\pm$ 0.90 | 22.74 $\pm$ 0.99 | 23.27 $\pm$ 1.20 |
| <i>P.pastoris</i> :ENV    | 22.06 $\pm$ 1.63 | 22.63 $\pm$ 1.77 | 23.71 $\pm$ 2.02 |
| <i>P.pastoris</i> :ENVNS1 | 20.86 $\pm$ 0.55 | 22.03 $\pm$ 1.03 | 22.75 $\pm$ 1.01 |
